# Supplementary material for: Combination anti-Aβ treatment maximizes cognitive recovery and rebalances mTOR signaling in APP mice
Source: PubMed Central journal article supplement — J Exp Med. 2018 May 7;215(5):1349–64. doi: 10.1084/jem.20171484 (PMC5940263; doi:10.1084/jem.20171484), 2018-05-07
Supplement: JEM_20171484_TableS1.pdf [file JEM_20171484_TableS1.pdf]

Table S1. Acute APP Suppression Pilot Study (Figure S1)

|                                                                   | Test                                 | Measure                             | Effect                           | df      | F value   | p value  |
|-------------------------------------------------------------------|--------------------------------------|-------------------------------------|----------------------------------|---------|-----------|----------|
| APP immunoblot                                                    | Two-way ANOVA                        | Signal intensity, relative to GAPDH | Treatment                        | 1, 10   | 132.3     | < 0.0001 |
|                                                                   |                                      |                                     | Age                              | 1, 10   | 0.0104    | 0.9207   |
|                                                                   |                                      |                                     | Interaction                      | 1, 10   | 0.0104    | 0.9207   |
| CS Silver, cortex                                                 | Students t-test                      | % Surface area                      | Treatment                        | 5       | t = 1.193 | 0.2864   |
| CS Silver, hippocampus                                            | Students t-test                      | % Surface area                      | Treatment                        | 5       | t = 1.139 | 0.3064   |
| MWM                                                               | Two-way ANOVA                        | Days to criteria                    | Treatment                        | 1, 36   | 5.112     | 0.0299   |
|                                                                   |                                      |                                     | Genotype                         | 1, 36   | 28.61     | < 0.0001 |
|                                                                   |                                      |                                     | Interaction                      | 1, 36   | 0.30      | 0.5886   |
| RAWM                                                              | Two-way ANOVA                        | Average errors                      | Treatment                        | 1, 34   | 1.047     | 0.3134   |
|                                                                   |                                      |                                     | Genotype                         | 1, 34   | 21.39     | < 0.0001 |
|                                                                   |                                      |                                     | Interaction                      | 1, 34   | 0.013     | 0.9094   |
| RAWM                                                              | Two-way ANOVA with Repeated Measures | Errors per trial                    | Trial                            | 6, 204  | 2.93      | 0.0092   |
|                                                                   |                                      |                                     | Condition (genotype + treatment) | 3, 34   | 7.23      | 0.0007   |
|                                                                   |                                      |                                     | Interaction                      | 18, 204 | 0.60      | 0.9008   |
| <b>Amyloid Histology (Figure 2 and Figure S2)</b>                 |                                      |                                     |                                  |         |           |          |
|                                                                   | Test                                 | Measure                             | Effect                           | df      | F value   | p value  |
| CS Silver, Cortex                                                 | One-way ANOVA                        | % Surface area                      | Treatment                        | 4, 46   | 85.48     | < 0.0001 |
| NAB61, Cortex                                                     | One-way ANOVA                        | % Surface area                      | Treatment                        | 4, 46   | 16.22     | < 0.0001 |
| Thio-S, Cortex                                                    | One-way ANOVA                        | % Surface area                      | Treatment                        | 4, 46   | 19.62     | < 0.0001 |
| CS Silver, Hippocampus                                            | One-way ANOVA                        | % Surface area                      | Treatment                        | 4, 46   | 75.50     | < 0.0001 |
| NAB61, Hippocampus                                                | One-way ANOVA                        | % Surface area                      | Treatment                        | 4, 46   | 13.00     | < 0.0001 |
| Thio-S, Hippocampus                                               | One-way ANOVA                        | % Surface area                      | Treatment                        | 4, 46   | 20.34     | < 0.0001 |
| <b>A<math>\beta</math> ELISA (Figure S3)</b>                      |                                      |                                     |                                  |         |           |          |
|                                                                   | Test                                 | Measure                             | Effect                           | df      | F value   | p value  |
| Total A $\beta$ , TBS                                             | One-way ANOVA                        | Concentration                       | Treatment                        | 4, 70   | 54.25     | < 0.0001 |
| Total A $\beta$ , TBS-X                                           | One-way ANOVA                        | Concentration                       | Treatment                        | 4, 70   | 4.60      | 0.0024   |
| Total A $\beta$ , Guanidine                                       | One-way ANOVA                        | Concentration                       | Treatment                        | 4, 70   | 23.33     | < 0.0001 |
| A $\beta$ 40, TBS                                                 | One-way ANOVA                        | Concentration                       | Treatment                        | 4, 70   | 47.11     | < 0.0001 |
| A $\beta$ 40, TBS-X                                               | One-way ANOVA                        | Concentration                       | Treatment                        | 4, 70   | 3.981     | 0.0057   |
| A $\beta$ 40, Guanidine                                           | One-way ANOVA                        | Concentration                       | Treatment                        | 4, 70   | 21.93     | < 0.0001 |
| A $\beta$ 42, TBS                                                 | One-way ANOVA                        | Concentration                       | Treatment                        | 4, 70   | 49.38     | < 0.0001 |
| A $\beta$ 42, TBS-X                                               | One-way ANOVA                        | Concentration                       | Treatment                        | 4, 70   | 4.517     | 0.0026   |
| A $\beta$ 42, Guanidine                                           | One-way ANOVA                        | Concentration                       | Treatment                        | 4, 70   | 13.59     | < 0.0001 |
| <b>Synaptophysin, Ubiquitin, LAMP1 Immunostain (Figures 3, 4)</b> |                                      |                                     |                                  |         |           |          |
|                                                                   | Test                                 | Measure                             | Effect                           | df      | F value   | p value  |
| Synaptophysin                                                     | Two-way ANOVA with Repeated Measures | % surface area                      | Distance                         | 2, 92   | 256.3     | 0.0008   |
|                                                                   |                                      |                                     | Treatment                        | 4, 46   | 7.541     | < 0.0001 |
|                                                                   |                                      |                                     | Interaction                      | 8, 92   | 3.76      | < 0.0001 |
| Ubiquitin                                                         | One-way ANOVA                        | % surface area                      | Treatment                        | 4, 46   | 15.93     | < 0.0001 |
| LAMP1                                                             | One-way ANOVA                        | % surface area                      | Treatment                        | 4, 46   | 4.38      | 0.0044   |
| <b>TFEB, mTOR Immunoblots (Figures 4, 5)</b>                      |                                      |                                     |                                  |         |           |          |
|                                                                   | Test                                 | Measure                             | Effect                           | df      | F value   | p value  |
| TFEB                                                              | One-way ANOVA                        | Signal intensity, relative to GAPDH | Treatment                        | 4, 35   | 5.43      | 0.0016   |

|                                                                               |                                      |                                     |                  |         |              |          |
|-------------------------------------------------------------------------------|--------------------------------------|-------------------------------------|------------------|---------|--------------|----------|
| pS6                                                                           | One-way ANOVA                        | Signal intensity, relative to GAPDH | Treatment        | 4, 35   | 7.03         | 0.0003   |
| pAKT                                                                          | One-way ANOVA                        | Signal intensity, relative to GAPDH | Treatment        | 4, 35   | 9.26         | < 0.0001 |
| p-cofilin                                                                     | One-way ANOVA                        | Signal intensity, relative to GAPDH | Treatment        | 4, 35   | 7.83         | < 0.0001 |
| <b>Open Field (Figure S4)</b>                                                 |                                      |                                     |                  |         |              |          |
|                                                                               | Test                                 | Measure                             | Effect           | df      | F value      | p value  |
| Distance Traveled                                                             | One-way ANOVA                        | Distance traveled                   | Treatment        | 4, 126  | 0.26         | 0.9048   |
| % Path in Center                                                              | One-way ANOVA                        | % path                              | Treatment        | 4, 126  | 2.67         | 0.0357   |
| <b>Straight Swim (Figure S4)</b>                                              |                                      |                                     |                  |         |              |          |
|                                                                               | Test                                 | Measure                             | Effect           | df      | F value      | p value  |
| Mean speed                                                                    | One-way ANOVA                        | Swim speed                          | Treatment        | 4, 126  | 2.87         | 0.0258   |
| <b>MWM (Figure 6 and Figure S4)</b>                                           |                                      |                                     |                  |         |              |          |
|                                                                               | Test                                 | Measure                             | Effect           | df      | F or H value | p value  |
| Training                                                                      | Two-way ANOVA with Repeated Measures | Path length, days 1 and 2           | Day              | 1, 126  | 44.56        | < 0.0001 |
|                                                                               |                                      |                                     | Treatment        | 4, 126  | 4.45         | 0.0021   |
|                                                                               |                                      |                                     | Interaction      | 4, 126  | 2.83         | 0.0274   |
| Training                                                                      | Two-way ANOVA with Repeated Measures | STM Probe proximity, days 1 and 2   | Day              | 1, 126  | 19.09        | < 0.0001 |
|                                                                               |                                      |                                     | Treatment        | 4, 126  | 6.62         | < 0.0001 |
|                                                                               |                                      |                                     | Interaction      | 4, 126  | 3.82         | 0.0058   |
| Days to Criteria                                                              | Kruskal-Wallis                       | Number of Days                      | Treatment        | -       | 43.66        | < 0.0001 |
| LTM Probe                                                                     | One-way ANOVA                        | % Path in target                    | Treatment        | 4, 96   | 1.01         | 0.4078   |
| LTM Probe                                                                     | One-way ANOVA                        | Proximity                           | Treatment        | 4, 96   | 1.26         | 0.2894   |
| <b>Visible Platform (Figure S4)</b>                                           |                                      |                                     |                  |         |              |          |
|                                                                               | Test                                 | Measure                             | Effect           | df      | F value      | p value  |
| Distance traveled                                                             | One-way ANOVA                        | Average path length                 | Treatment        | 4, 126  | 2.39         | 0.0545   |
| <b>RAWM (Figure 6)</b>                                                        |                                      |                                     |                  |         |              |          |
|                                                                               | Test                                 | Measure                             | Effect           | df      | F value      | p value  |
| Total re-entry errors                                                         | One-way ANOVA                        | Errors                              | Treatment        | 4, 125  | 9.44         | < 0.0001 |
| Re-entry errors by trial                                                      | Two-way ANOVA with Repeated Measures | Errors                              | Trial            | 6, 750  | 4.073        | 0.0005   |
|                                                                               |                                      |                                     | Treatment        | 4, 125  | 9.42         | < 0.0001 |
|                                                                               |                                      |                                     | Interaction      | 24, 750 | 0.83         | 0.6901   |
| <b>CFC (Figure 6)</b>                                                         |                                      |                                     |                  |         |              |          |
|                                                                               | Test                                 | Measure                             | Effect           | df      | F value      | p value  |
| % Time immobile                                                               | One-way ANOVA                        | % Time immobile                     | Treatment        | 4, 126  | 3.27         | 0.0138   |
| % Time immobile by minute                                                     | Two-way ANOVA with Repeated Measures | % Time immobile                     | Minute           | 4, 504  | 16.81        | < 0.0001 |
|                                                                               |                                      |                                     | Treatment        | 4, 126  | 2.80         | 0.0288   |
|                                                                               |                                      |                                     | Interaction      | 16, 504 | 1.92         | 0.0166   |
| <b>Aggregate Behavior</b>                                                     |                                      |                                     |                  |         |              |          |
|                                                                               | Test                                 | Measure                             | Effect           | df      | F value      | p value  |
| Cognitive function                                                            | MANOVA                               | Behavioral Performance              | Treatment        | 3, 49   | 3.78         | 0.02     |
| <b>Behavioral Performance vs. A<math>\beta</math> Correlations (Figure 7)</b> |                                      |                                     |                  |         |              |          |
|                                                                               | Test                                 | Measure                             | Effect           | df      | F value      | p value  |
| MWM Total Ave Distance                                                        | ANOVA                                | Total A $\beta$ , TBS               | linear           | 1, 73   | 23.85        | <0.0001  |
| MWM Total Ave Distance                                                        | ANOVA                                | Total A $\beta$ , TBS               | poly, degree = 2 | 2, 72   | 21.95        | <<0.0001 |

|                                           |                 |                         |                  |       |         |          |
|-------------------------------------------|-----------------|-------------------------|------------------|-------|---------|----------|
| MWM, D2 Probe Proximity                   | ANOVA           | Total A $\beta$ , TBS   | poly, degree = 2 | 2, 72 | 16.16   | <<0.0001 |
| RAWM Ave Errors                           | ANOVA           | Total A $\beta$ , TBS   | poly, degree = 2 | 2, 72 | 31.39   | <<0.0001 |
| <b>ISF A<math>\beta</math> (Figure 7)</b> |                 |                         |                  |       |         |          |
|                                           | Test            | Measure                 | Effect           | df    | t value | p value  |
| A $\beta$ 40                              | Students t-test | A $\beta$ concentration | Treatment        | 11    | 2.78    | 0.0179   |
| A $\beta$ 42                              | Students t-test | A $\beta$ concentration | Treatment        | 7     | 4.97    | 0.0016   |

|                                                                   |                        |                        |                         |                        |                     |                         |
|-------------------------------------------------------------------|------------------------|------------------------|-------------------------|------------------------|---------------------|-------------------------|
| <b>Pearson Correlations</b>                                       |                        |                        |                         |                        |                     |                         |
| <b>A<math>\beta</math> concentration</b>                          |                        |                        |                         |                        |                     |                         |
|                                                                   | A $\beta$ 40, TBS      | A $\beta$ 40, TBS-X    | A $\beta$ 40, Guanidine | A $\beta$ 42, TBS      | A $\beta$ 42, TBS-X | A $\beta$ 42, Guanidine |
| A $\beta$ 40, TBS                                                 | 1.000                  | 0.570                  | 0.511                   | 0.935                  | 0.512               | 0.432                   |
| A $\beta$ 40, TBS-X                                               | 0.570                  | 1.000                  | 0.222                   | 0.590                  | 0.802               | 0.196                   |
| A $\beta$ 40, Guanidine                                           | 0.511                  | 0.222                  | 1.000                   | 0.517                  | 0.166               | 0.246                   |
| A $\beta$ 42, TBS                                                 | 0.935                  | 0.590                  | 0.517                   | 1.000                  | 0.546               | 0.381                   |
| A $\beta$ 42, TBS-X                                               | 0.512                  | 0.802                  | 0.166                   | 0.546                  | 1.000               | 0.233                   |
| A $\beta$ 42, Guanidine                                           | 0.432                  | 0.196                  | 0.246                   | 0.381                  | 0.233               | 1.000                   |
| <b>Behavioral performance</b>                                     |                        |                        |                         |                        |                     |                         |
|                                                                   | MWM Total Ave Distance | MWM D2 Probe Proximity | RAWM Ave Errors         | FC Ave % Time Immobile |                     |                         |
| MWM Total Ave Distance                                            | 1.000                  | 0.679                  | 0.551                   | -0.069                 |                     |                         |
| MWM D2 Probe Proximity                                            | 0.679                  | 1.000                  | 0.378                   | -0.171                 |                     |                         |
| RAWM Ave Errors                                                   | 0.551                  | 0.378                  | 1.000                   | -0.109                 |                     |                         |
| FC Ave % Time Immobile                                            | -0.069                 | -0.171                 | -0.109                  | 1.000                  |                     |                         |
| <b>A<math>\beta</math> concentration x Behavioral performance</b> |                        |                        |                         |                        |                     |                         |
|                                                                   | MWM Total Ave Distance | MWM D2 Probe Proximity | RAWM Ave Errors         | FC Ave % Time Immobile |                     |                         |
| A $\beta$ 40, TBS                                                 | 0.513                  | 0.404                  | 0.626                   | -0.103                 |                     |                         |
| A $\beta$ 40, TBS-X                                               | 0.022                  | 0.263                  | 0.340                   | -0.072                 |                     |                         |
| A $\beta$ 40, Guanidine                                           | 0.356                  | 0.303                  | 0.528                   | -0.167                 |                     |                         |
| A $\beta$ 42, TBS                                                 | 0.475                  | 0.409                  | 0.636                   | -0.067                 |                     |                         |
| A $\beta$ 42, TBS-X                                               | 0.060                  | 0.244                  | 0.295                   | 0.034                  |                     |                         |
| A $\beta$ 42, Guanidine                                           | 0.239                  | 0.328                  | 0.208                   | -0.090                 |                     |                         |

|                                                             |              |         |          |  |
|-------------------------------------------------------------|--------------|---------|----------|--|
| <b>Additional Posthoc Analyses</b>                          |              |         |          |  |
| *, P < 0.05; **, P < 0.01; ***, P < 0.001; ****, P < 0.0001 |              |         |          |  |
| <b>Amyloid Histology (Figure 2 and Figure S2)</b>           |              |         |          |  |
| <b>CS Silver Cortex (Tukey post hoc)</b>                    |              |         |          |  |
| Comparison                                                  | Significant? | Summary | p value  |  |
| Pretreatment vs No Treatment                                | Yes          | ****    | < 0.0001 |  |
| Pretreatment vs Ab9 Only                                    | Yes          | ****    | < 0.0001 |  |
| Pretreatment vs Dox Only                                    | No           | ns      | 0.9924   |  |
| Pretreatment vs Dox + Ab9                                   | Yes          | ****    | < 0.0001 |  |
| Dox Only vs Dox + Ab9                                       | Yes          | ****    | < 0.0001 |  |
| No Treatment vs Ab9 Only                                    | Yes          | **      | 0.0039   |  |
| No Treatment vs Dox Only                                    | Yes          | ****    | < 0.0001 |  |
| No Treatment vs Dox + Ab9                                   | Yes          | ****    | < 0.0001 |  |
| Ab9 Only vs Dox Only                                        | Yes          | ****    | < 0.0001 |  |
| Ab9 Only vs Dox + Ab9                                       | Yes          | ****    | < 0.0001 |  |
| <b>CS Silver Hippocampus (Tukey post hoc)</b>               |              |         |          |  |

| Comparison                   | Significant? | Summary | p value  |
|------------------------------|--------------|---------|----------|
| Pretreatment vs No Treatment | Yes          | ****    | < 0.0001 |
| Pretreatment vs Ab9 Only     | Yes          | ****    | < 0.0001 |
| Pretreatment vs Dox Only     | No           | ns      | 0.9739   |
| Pretreatment vs Dox + Ab9    | Yes          | ***     | 0.0006   |
| Dox Only vs Dox + Ab9        | Yes          | **      | 0.0030   |
| No Treatment vs Ab9 Only     | No           | ns      | 0.0734   |
| No Treatment vs Dox Only     | Yes          | ****    | < 0.0001 |
| No Treatment vs Dox + Ab9    | Yes          | ****    | < 0.0001 |
| Ab9 Only vs Dox Only         | Yes          | ****    | < 0.0001 |
| Ab9 Only vs Dox + Ab9        | Yes          | ****    | < 0.0001 |

### NAB61 Cortex (Tukey post hoc)

| Comparison                   | Significant? | Summary | p value  |
|------------------------------|--------------|---------|----------|
| Pretreatment vs No Treatment | Yes          | **      | 0.0018   |
| Pretreatment vs Ab9 Only     | No           | ns      | 0.2721   |
| Pretreatment vs Dox Only     | No           | ns      | 0.2092   |
| Pretreatment vs Dox + Ab9    | No           | ns      | 0.0859   |
| Dox Only vs Dox + Ab9        | No           | ns      | 0.9873   |
| No Treatment vs Ab9 Only     | No           | ns      | 0.3527   |
| No Treatment vs Dox Only     | Yes          | ****    | < 0.0001 |
| No Treatment vs Dox + Ab9    | Yes          | ****    | < 0.0001 |
| Ab9 Only vs Dox Only         | Yes          | **      | 0.0012   |
| Ab9 Only vs Dox + Ab9        | Yes          | ***     | 0.0004   |

### NAB61 Hippocampus (Tukey post hoc)

| Comparison                   | Significant? | Summary | p value  |
|------------------------------|--------------|---------|----------|
| Pretreatment vs No Treatment | Yes          | ***     | 0.0004   |
| Pretreatment vs Ab9 Only     | No           | ns      | 0.4994   |
| Pretreatment vs Dox Only     | No           | ns      | 0.8668   |
| Pretreatment vs Dox + Ab9    | No           | ns      | 0.3908   |
| Dox Only vs Dox + Ab9        | No           | ns      | 0.9090   |
| No Treatment vs Ab9 Only     | No           | ns      | 0.0566   |
| No Treatment vs Dox Only     | Yes          | ****    | < 0.0001 |
| No Treatment vs Dox + Ab9    | Yes          | ****    | < 0.0001 |
| Ab9 Only vs Dox Only         | No           | ns      | 0.0892   |
| Ab9 Only vs Dox + Ab9        | Yes          | *       | 0.0133   |

### Thioflavin-S Cortex (Tukey post hoc)

| Comparison                   | Significant? | Summary | p value  |
|------------------------------|--------------|---------|----------|
| Pretreatment vs No Treatment | Yes          | ****    | < 0.0001 |
| Pretreatment vs Ab9 Only     | Yes          | **      | 0.0051   |
| Pretreatment vs Dox Only     | No           | ns      | 0.9994   |
| Pretreatment vs Dox + Ab9    | No           | ns      | 0.9453   |
| Dox Only vs Dox + Ab9        | No           | ns      | 0.8594   |
| No Treatment vs Ab9 Only     | No           | ns      | 0.0868   |
| No Treatment vs Dox Only     | Yes          | ****    | < 0.0001 |
| No Treatment vs Dox + Ab9    | Yes          | ****    | < 0.0001 |
| Ab9 Only vs Dox Only         | Yes          | **      | 0.0076   |
| Ab9 Only vs Dox + Ab9        | Yes          | ***     | 0.0006   |

### Thioflavin-S Hippocampus (Tukey post hoc)

| Comparison                   | Significant? | Summary | p value  |
|------------------------------|--------------|---------|----------|
| Pretreatment vs No Treatment | Yes          | ****    | < 0.0001 |
| Pretreatment vs Ab9 Only     | Yes          | ***     | 0.0009   |
| Pretreatment vs Dox Only     | No           | ns      | 0.8641   |
| Pretreatment vs Dox + Ab9    | No           | ns      | 0.8431   |
| Dox Only vs Dox + Ab9        | No           | ns      | > 0.9999 |
| No Treatment vs Ab9 Only     | No           | ns      | 0.7626   |
| No Treatment vs Dox Only     | Yes          | ****    | < 0.0001 |
| No Treatment vs Dox + Ab9    | Yes          | ****    | < 0.0001 |
| Ab9 Only vs Dox Only         | Yes          | ****    | < 0.0001 |
| Ab9 Only vs Dox + Ab9        | Yes          | ****    | < 0.0001 |

| <b>TBS A<math>\beta</math>40 ELISA (Tukey post hoc)</b>     |              |         |          |
|-------------------------------------------------------------|--------------|---------|----------|
| Comparison                                                  | Significant? | Summary | p value  |
| Pretreatment vs No Treatment                                | Yes          | ****    | < 0.0001 |
| Pretreatment vs Ab9 Only                                    | Yes          | ****    | < 0.0001 |
| Pretreatment vs Dox Only                                    | Yes          | ***     | 0.0007   |
| Pretreatment vs Dox + Ab9                                   | Yes          | ****    | < 0.0001 |
| Dox Only vs Dox + Ab9                                       | No           | ns      | 0.9136   |
| No Treatment vs Ab9 Only                                    | No           | ns      | 0.9951   |
| No Treatment vs Dox Only                                    | Yes          | ****    | < 0.0001 |
| No Treatment vs Dox + Ab9                                   | Yes          | ****    | < 0.0001 |
| Ab9 Only vs Dox Only                                        | Yes          | ****    | < 0.0001 |
| Ab9 Only vs Dox + Ab9                                       | Yes          | ****    | < 0.0001 |
| <b>TBS A<math>\beta</math>42 ELISA (Tukey post hoc)</b>     |              |         |          |
| Comparison                                                  | Significant? | Summary | p value  |
| Pretreatment vs No Treatment                                | Yes          | ***     | 0.0002   |
| Pretreatment vs Ab9 Only                                    | Yes          | ***     | 0.0008   |
| Pretreatment vs Dox Only                                    | Yes          | ****    | < 0.0001 |
| Pretreatment vs Dox + Ab9                                   | Yes          | ****    | < 0.0001 |
| Dox Only vs Dox + Ab9                                       | No           | ns      | 0.9281   |
| No Treatment vs Ab9 Only                                    | No           | ns      | 0.9926   |
| No Treatment vs Dox Only                                    | Yes          | ****    | < 0.0001 |
| No Treatment vs Dox + Ab9                                   | Yes          | ****    | < 0.0001 |
| Ab9 Only vs Dox Only                                        | Yes          | ****    | < 0.0001 |
| Ab9 Only vs Dox + Ab9                                       | Yes          | ****    | < 0.0001 |
| <b>TBS Total A<math>\beta</math> ELISA (Tukey post hoc)</b> |              |         |          |
| Comparison                                                  | Significant? | Summary | p value  |
| Pretreatment vs No Treatment                                | Yes          | ****    | < 0.0001 |
| Pretreatment vs Ab9 Only                                    | Yes          | ****    | < 0.0001 |
| Pretreatment vs Dox Only                                    | Yes          | ****    | < 0.0001 |
| Pretreatment vs Dox + Ab9                                   | Yes          | ****    | < 0.0001 |
| Dox Only vs Dox + Ab9                                       | No           | ns      | 0.9071   |
| No Treatment vs Ab9 Only                                    | No           | ns      | > 0.9999 |
| No Treatment vs Dox Only                                    | Yes          | ****    | < 0.0001 |
| No Treatment vs Dox + Ab9                                   | Yes          | ****    | < 0.0001 |
| Ab9 Only vs Dox Only                                        | Yes          | ****    | < 0.0001 |
| Ab9 Only vs Dox + Ab9                                       | Yes          | ****    | < 0.0001 |
| <b>TBS-X A<math>\beta</math>40 ELISA (Tukey post hoc)</b>   |              |         |          |
| Comparison                                                  | Significant? | Summary | p value  |
| Pretreatment vs No Treatment                                | No           | ns      | 0.3633   |
| Pretreatment vs Ab9 Only                                    | No           | ns      | 0.1306   |
| Pretreatment vs Dox Only                                    | No           | ns      | 0.9656   |
| Pretreatment vs Dox + Ab9                                   | No           | ns      | 0.9821   |
| Dox Only vs Dox + Ab9                                       | No           | ns      | > 0.9999 |
| No Treatment vs Ab9 Only                                    | No           | ns      | 0.9809   |
| No Treatment vs Dox Only                                    | No           | ns      | 0.1057   |
| No Treatment vs Dox + Ab9                                   | No           | ns      | 0.1332   |
| Ab9 Only vs Dox Only                                        | Yes          | *       | 0.0266   |
| Ab9 Only vs Dox + Ab9                                       | Yes          | *       | 0.0353   |
| <b>TBS-X A<math>\beta</math>42 ELISA (Tukey post hoc)</b>   |              |         |          |
| Comparison                                                  | Significant? | Summary | p value  |
| Pretreatment vs No Treatment                                | No           | ns      | 0.9962   |
| Pretreatment vs Ab9 Only                                    | No           | ns      | 0.2458   |
| Pretreatment vs Dox Only                                    | No           | ns      | 0.8401   |
| Pretreatment vs Dox + Ab9                                   | No           | ns      | 0.3261   |
| Dox Only vs Dox + Ab9                                       | No           | ns      | 0.9067   |
| No Treatment vs Ab9 Only                                    | No           | ns      | 0.4377   |
| No Treatment vs Dox Only                                    | No           | ns      | 0.6337   |
| No Treatment vs Dox + Ab9                                   | No           | ns      | 0.1689   |
| Ab9 Only vs Dox Only                                        | Yes          | *       | 0.0227   |
| Ab9 Only vs Dox + Ab9                                       | Yes          | **      | 0.0016   |

| <b>TBS-X Total A<math>\beta</math> ELISA (Tukey post hoc)</b>     |              |         |          |
|-------------------------------------------------------------------|--------------|---------|----------|
| Comparison                                                        | Significant? | Summary | p value  |
| Pretreatment vs No Treatment                                      | No           | ns      | 0.9569   |
| Pretreatment vs Ab9 Only                                          | No           | ns      | 0.1857   |
| Pretreatment vs Dox Only                                          | No           | ns      | 0.8595   |
| Pretreatment vs Dox + Ab9                                         | No           | ns      | 0.4519   |
| Dox Only vs Dox + Ab9                                             | No           | ns      | 0.9574   |
| No Treatment vs Ab9 Only                                          | No           | ns      | 0.5521   |
| No Treatment vs Dox Only                                          | No           | ns      | 0.4505   |
| No Treatment vs Dox + Ab9                                         | No           | ns      | 0.1340   |
| Ab9 Only vs Dox Only                                              | Yes          | *       | 0.0168   |
| Ab9 Only vs Dox + Ab9                                             | Yes          | **      | 0.0020   |
| <b>Guanidine A<math>\beta</math>40 ELISA (Tukey post hoc)</b>     |              |         |          |
| Comparison                                                        | Significant? | Summary | p value  |
| Pretreatment vs No Treatment                                      | Yes          | ****    | < 0.0001 |
| Pretreatment vs Ab9 Only                                          | No           | ns      | 0.4579   |
| Pretreatment vs Dox Only                                          | No           | ns      | 0.6246   |
| Pretreatment vs Dox + Ab9                                         | No           | ns      | 0.4894   |
| Dox Only vs Dox + Ab9                                             | No           | ns      | 0.9995   |
| No Treatment vs Ab9 Only                                          | Yes          | ****    | < 0.0001 |
| No Treatment vs Dox Only                                          | Yes          | ****    | < 0.0001 |
| No Treatment vs Dox + Ab9                                         | Yes          | ****    | < 0.0001 |
| Ab9 Only vs Dox Only                                              | Yes          | *       | 0.0239   |
| Ab9 Only vs Dox + Ab9                                             | Yes          | *       | 0.0131   |
| <b>Guanidine A<math>\beta</math>42 ELISA (Tukey post hoc)</b>     |              |         |          |
| Comparison                                                        | Significant? | Summary | p value  |
| Pretreatment vs No Treatment                                      | No           | ns      | 0.0812   |
| Pretreatment vs Ab9 Only                                          | Yes          | ****    | < 0.0001 |
| Pretreatment vs Dox Only                                          | No           | ns      | 0.0830   |
| Pretreatment vs Dox + Ab9                                         | No           | ns      | 0.9342   |
| Dox Only vs Dox + Ab9                                             | Yes          | *       | 0.0103   |
| No Treatment vs Ab9 Only                                          | Yes          | *       | 0.0153   |
| No Treatment vs Dox Only                                          | No           | ns      | > 0.9999 |
| No Treatment vs Dox + Ab9                                         | Yes          | **      | 0.0100   |
| Ab9 Only vs Dox Only                                              | Yes          | *       | 0.0149   |
| Ab9 Only vs Dox + Ab9                                             | Yes          | ****    | < 0.0001 |
| <b>Guanidine Total A<math>\beta</math> ELISA (Tukey post hoc)</b> |              |         |          |
| Comparison                                                        | Significant? | Summary | p value  |
| Pretreatment vs No Treatment                                      | Yes          | ****    | < 0.0001 |
| Pretreatment vs Ab9 Only                                          | No           | ns      | 0.0634   |
| Pretreatment vs Dox Only                                          | No           | ns      | 0.9062   |
| Pretreatment vs Dox + Ab9                                         | No           | ns      | 0.4351   |
| Dox Only vs Dox + Ab9                                             | No           | ns      | 0.9181   |
| No Treatment vs Ab9 Only                                          | Yes          | **      | 0.0014   |
| No Treatment vs Dox Only                                          | Yes          | ****    | < 0.0001 |
| No Treatment vs Dox + Ab9                                         | Yes          | ****    | < 0.0001 |
| Ab9 Only vs Dox Only                                              | Yes          | **      | 0.0056   |
| Ab9 Only vs Dox + Ab9                                             | Yes          | ***     | 0.0003   |
| <b>Synaptophysin Histology (Figure 3)</b>                         |              |         |          |
| <b>10 <math>\mu</math>m (Tukey post hoc)</b>                      |              |         |          |
| Comparison                                                        | Significant? | Summary | p value  |
| Pretreatment vs No Treatment                                      | No           | ns      | 0.8117   |
| Pretreatment vs Ab9 Only                                          | Yes          | *       | 0.0105   |
| Pretreatment vs Dox Only                                          | No           | ns      | 0.1637   |
| Pretreatment vs Dox + Ab9                                         | Yes          | **      | 0.0012   |
| Dox Only vs Dox + Ab9                                             | No           | ns      | 0.3987   |
| No Treatment vs Ab9 Only                                          | No           | ns      | 0.1453   |
| No Treatment vs Dox Only                                          | No           | ns      | 0.7504   |
| No Treatment vs Dox + Ab9                                         | Yes          | *       | 0.0313   |

|                                                 |              |         |          |
|-------------------------------------------------|--------------|---------|----------|
| Ab9 Only vs Dox Only                            | No           | ns      | 0.7637   |
| Ab9 Only vs Dox + Ab9                           | No           | ns      | 0.9847   |
| <b>20 <math>\mu</math>m (Tukey post hoc)</b>    |              |         |          |
| Comparison                                      | Significant? | Summary | p value  |
| Pretreatment vs No Treatment                    | No           | ns      | 0.9959   |
| Pretreatment vs Ab9 Only                        | No           | ns      | 0.0979   |
| Pretreatment vs Dox Only                        | Yes          | ***     | 0.0001   |
| Pretreatment vs Dox + Ab9                       | Yes          | ****    | < 0.0001 |
| Dox Only vs Dox + Ab9                           | No           | ns      | 0.8676   |
| No Treatment vs Ab9 Only                        | No           | ns      | 0.1904   |
| No Treatment vs Dox Only                        | Yes          | ***     | 0.0004   |
| No Treatment vs Dox + Ab9                       | Yes          | ****    | < 0.0001 |
| Ab9 Only vs Dox Only                            | No           | ns      | 0.3713   |
| Ab9 Only vs Dox + Ab9                           | No           | ns      | 0.0597   |
| <b>30 <math>\mu</math>m (Tukey post hoc)</b>    |              |         |          |
| Comparison                                      | Significant? | Summary | p value  |
| Pretreatment vs No Treatment                    | No           | ns      | 0.8085   |
| Pretreatment vs Ab9 Only                        | No           | ns      | 0.4338   |
| Pretreatment vs Dox Only                        | No           | ns      | 0.0817   |
| Pretreatment vs Dox + Ab9                       | Yes          | *       | 0.0153   |
| Dox Only vs Dox + Ab9                           | No           | ns      | 0.9592   |
| No Treatment vs Ab9 Only                        | No           | ns      | 0.9608   |
| No Treatment vs Dox Only                        | No           | ns      | 0.5573   |
| No Treatment vs Dox + Ab9                       | No           | ns      | 0.2012   |
| Ab9 Only vs Dox Only                            | No           | ns      | 0.9429   |
| Ab9 Only vs Dox + Ab9                           | No           | ns      | 0.6348   |
| <b>Ubiquitin, LAMP1 Immunostains (Figure 4)</b> |              |         |          |
| <b>Ubiquitin (Tukey post hoc)</b>               |              |         |          |
| Comparison                                      | Significant? | Summary | p value  |
| Pretreatment vs No Treatment                    | No           | ns      | 0.8433   |
| Pretreatment vs Ab9 Only                        | No           | ns      | 0.9891   |
| Pretreatment vs Dox Only                        | Yes          | **      | 0.0016   |
| Pretreatment vs Dox + Ab9                       | Yes          | ****    | < 0.0001 |
| Dox Only vs Dox + Ab9                           | No           | ns      | 0.8274   |
| No Treatment vs Ab9 Only                        | No           | ns      | 0.9862   |
| No Treatment vs Dox Only                        | Yes          | ****    | < 0.0001 |
| No Treatment vs Dox + Ab9                       | Yes          | ****    | < 0.0001 |
| Ab9 Only vs Dox Only                            | Yes          | ***     | 0.0005   |
| Ab9 Only vs Dox + Ab9                           | Yes          | ****    | < 0.0001 |
| <b>LAMP1 (Tukey post hoc)</b>                   |              |         |          |
| Comparison                                      | Significant? | Summary | p value  |
| Pretreatment vs No Treatment                    | No           | ns      | 0.9997   |
| Pretreatment vs Ab9 Only                        | No           | ns      | > 0.9999 |
| Pretreatment vs Dox Only                        | No           | ns      | 0.1169   |
| Pretreatment vs Dox + Ab9                       | No           | ns      | 0.0538   |
| Dox Only vs Dox + Ab9                           | No           | ns      | 0.9938   |
| No Treatment vs Ab9 Only                        | No           | ns      | 0.9989   |
| No Treatment vs Dox Only                        | No           | ns      | 0.0657   |
| No Treatment vs Dox + Ab9                       | Yes          | *       | 0.0282   |
| Ab9 Only vs Dox Only                            | No           | ns      | 0.1571   |
| Ab9 Only vs Dox + Ab9                           | No           | ns      | 0.0761   |
| <b>TFEB, mTOR Immunoblots (Figures 4 and 5)</b> |              |         |          |
| <b>TFEB (Tukey post hoc)</b>                    |              |         |          |
| Comparison                                      | Significant? | Summary | p value  |
| Pretreatment vs No Treatment                    | No           | ns      | 0.9557   |
| Pretreatment vs Ab9 Only                        | No           | ns      | 0.7303   |
| Pretreatment vs Dox Only                        | No           | ns      | 0.8475   |
| Pretreatment vs Dox + Ab9                       | Yes          | *       | 0.0431   |
| Dox Only vs Dox + Ab9                           | No           | ns      | 0.3233   |

|                           |     |    |        |
|---------------------------|-----|----|--------|
| No Treatment vs Ab9 Only  | No  | ns | 0.9826 |
| No Treatment vs Dox Only  | No  | ns | 0.4407 |
| No Treatment vs Dox + Ab9 | Yes | ** | 0.0074 |
| Ab9 Only vs Dox Only      | No  | ns | 0.1857 |
| Ab9 Only vs Dox + Ab9     | Yes | ** | 0.0017 |

**p-s6 (Tukey post hoc)**

| Comparison                   | Significant? | Summary | p value |
|------------------------------|--------------|---------|---------|
| Pretreatment vs No Treatment | No           | ns      | 0.9986  |
| Pretreatment vs Ab9 Only     | No           | ns      | 0.9285  |
| Pretreatment vs Dox Only     | No           | ns      | 0.1085  |
| Pretreatment vs Dox + Ab9    | Yes          | **      | 0.0070  |
| Dox Only vs Dox + Ab9        | No           | ns      | 0.7871  |
| No Treatment vs Ab9 Only     | No           | ns      | 0.8151  |
| No Treatment vs Dox Only     | No           | ns      | 0.1880  |
| No Treatment vs Dox + Ab9    | Yes          | *       | 0.0145  |
| Ab9 Only vs Dox Only         | Yes          | *       | 0.0167  |
| Ab9 Only vs Dox + Ab9        | Yes          | ***     | 0.0007  |

**p-AKT (Tukey post hoc)**

| Comparison                   | Significant? | Summary | p value  |
|------------------------------|--------------|---------|----------|
| Pretreatment vs No Treatment | No           | ns      | > 0.9999 |
| Pretreatment vs Ab9 Only     | No           | ns      | 0.9066   |
| Pretreatment vs Dox Only     | No           | ns      | 0.2471   |
| Pretreatment vs Dox + Ab9    | Yes          | ***     | 0.0008   |
| Dox Only vs Dox + Ab9        | No           | ns      | 0.1625   |
| No Treatment vs Ab9 Only     | No           | ns      | 0.9435   |
| No Treatment vs Dox Only     | No           | ns      | 0.1998   |
| No Treatment vs Dox + Ab9    | Yes          | ***     | 0.0006   |
| Ab9 Only vs Dox Only         | Yes          | *       | 0.0412   |
| Ab9 Only vs Dox + Ab9        | Yes          | ****    | < 0.0001 |

**p-cofilin (Tukey post hoc)**

| Comparison                   | Significant? | Summary | p value  |
|------------------------------|--------------|---------|----------|
| Pretreatment vs No Treatment | No           | ns      | 0.9997   |
| Pretreatment vs Ab9 Only     | No           | ns      | > 0.9999 |
| Pretreatment vs Dox Only     | Yes          | *       | 0.0295   |
| Pretreatment vs Dox + Ab9    | Yes          | **      | 0.0023   |
| Dox Only vs Dox + Ab9        | No           | ns      | 0.8729   |
| No Treatment vs Ab9 Only     | No           | ns      | 0.9978   |
| No Treatment vs Dox Only     | Yes          | *       | 0.0463   |
| No Treatment vs Dox + Ab9    | Yes          | **      | 0.0040   |
| Ab9 Only vs Dox Only         | Yes          | *       | 0.0217   |
| Ab9 Only vs Dox + Ab9        | Yes          | **      | 0.0017   |

**Behavior (Figure 6)**

**MWM Days to criteria (Dunn's)**

| Comparison                   | Significant? | Summary | p value  |
|------------------------------|--------------|---------|----------|
| Pretreatment vs No Treatment | No           | ns      | 0.2018   |
| Pretreatment vs Ab9 Only     | No           | ns      | > 0.9999 |
| Pretreatment vs Dox Only     | No           | ns      | 0.8903   |
| Pretreatment vs Dox + Ab9    | Yes          | **      | 0.0031   |
| Dox Only vs Dox + Ab9        | No           | ns      | 0.4815   |
| No Treatment vs Ab9 Only     | No           | ns      | 0.8852   |
| No Treatment vs Dox Only     | Yes          | ***     | 0.0003   |
| No Treatment vs Dox + Ab9    | Yes          | ****    | < 0.0001 |
| Ab9 Only vs Dox Only         | No           | ns      | 0.1641   |
| Ab9 Only vs Dox + Ab9        | Yes          | ***     | 0.0001   |

**MWM STM Probe (Tukey post hoc)**

| Day 1 Comparison             | Significant? | Summary | p value  |
|------------------------------|--------------|---------|----------|
| Pretreatment vs No Treatment | No           | ns      | > 0.9999 |
| Pretreatment vs Ab9 Only     | No           | ns      | 0.9778   |
| Pretreatment vs Dox Only     | No           | ns      | 0.6302   |



|                           |    |    |          |
|---------------------------|----|----|----------|
| Pretreatment vs Dox + Ab9 | No | ns | 0.5610   |
| Dox Only vs Dox + Ab9     | No | ns | > 0.9999 |
| No Treatment vs Ab9 Only  | No | ns | 0.9817   |
| No Treatment vs Dox Only  | No | ns | 0.5596   |
| No Treatment vs Dox + Ab9 | No | ns | 0.4890   |
| Ab9 Only vs Dox Only      | No | ns | 0.2572   |
| Ab9 Only vs Dox + Ab9     | No | ns | 0.2116   |

| Day 2 Comparison             | Significant? | Summary | p value  |
|------------------------------|--------------|---------|----------|
| Pretreatment vs No Treatment | No           | ns      | 0.0928   |
| Pretreatment vs Ab9 Only     | No           | ns      | 0.4380   |
| Pretreatment vs Dox Only     | No           | ns      | 0.6816   |
| Pretreatment vs Dox + Ab9    | Yes          | *       | 0.0440   |
| Dox Only vs Dox + Ab9        | No           | ns      | 0.5401   |
| No Treatment vs Ab9 Only     | No           | ns      | 0.9318   |
| No Treatment vs Dox Only     | Yes          | ***     | 0.0009   |
| No Treatment vs Dox + Ab9    | Yes          | ****    | < 0.0001 |
| Ab9 Only vs Dox Only         | Yes          | *       | 0.0187   |
| Ab9 Only vs Dox + Ab9        | Yes          | ****    | < 0.0001 |

**RAWM Total Error (Tukey post hoc)**

| Comparison                   | Significant? | Summary | p value  |
|------------------------------|--------------|---------|----------|
| Pretreatment vs No Treatment | No           | ns      | 0.1323   |
| Pretreatment vs Ab9 Only     | No           | ns      | 0.9815   |
| Pretreatment vs Dox Only     | No           | ns      | 0.2754   |
| Pretreatment vs Dox + Ab9    | Yes          | *       | 0.0380   |
| Dox Only vs Dox + Ab9        | No           | ns      | 0.8836   |
| No Treatment vs Ab9 Only     | No           | ns      | 0.3434   |
| No Treatment vs Dox Only     | Yes          | ***     | 0.0001   |
| No Treatment vs Dox + Ab9    | Yes          | ****    | < 0.0001 |
| Ab9 Only vs Dox Only         | No           | ns      | 0.0704   |
| Ab9 Only vs Dox + Ab9        | Yes          | **      | 0.0051   |

**RAWM Error by Trial (Tukey post hoc)**

| Trial 1 Comparison           | Significant? | Summary | p value |
|------------------------------|--------------|---------|---------|
| Pretreatment vs No Treatment | No           | ns      | 0.9852  |
| Pretreatment vs Ab9 Only     | No           | ns      | 0.8319  |
| Pretreatment vs Dox Only     | No           | ns      | 0.9989  |
| Pretreatment vs Dox + Ab9    | No           | ns      | 0.6624  |
| Dox Only vs Dox + Ab9        | No           | ns      | 0.7911  |
| No Treatment vs Ab9 Only     | No           | ns      | 0.9800  |
| No Treatment vs Dox Only     | No           | ns      | 0.9989  |
| No Treatment vs Dox + Ab9    | No           | ns      | 0.9056  |
| Ab9 Only vs Dox Only         | No           | ns      | 0.9243  |
| Ab9 Only vs Dox + Ab9        | No           | ns      | 0.9981  |

| Trial 2 Comparison           | Significant? | Summary | p value |
|------------------------------|--------------|---------|---------|
| Pretreatment vs No Treatment | No           | ns      | 0.8622  |
| Pretreatment vs Ab9 Only     | No           | ns      | 0.9786  |
| Pretreatment vs Dox Only     | No           | ns      | 0.3352  |
| Pretreatment vs Dox + Ab9    | No           | ns      | 0.2039  |
| Dox Only vs Dox + Ab9        | No           | ns      | 0.9982  |
| No Treatment vs Ab9 Only     | No           | ns      | 0.4833  |
| No Treatment vs Dox Only     | Yes          | *       | 0.0236  |
| No Treatment vs Dox + Ab9    | Yes          | **      | 0.0099  |
| Ab9 Only vs Dox Only         | No           | ns      | 0.6726  |
| Ab9 Only vs Dox + Ab9        | No           | ns      | 0.4880  |

| Trial 3 Comparison           | Significant? | Summary | p value |
|------------------------------|--------------|---------|---------|
| Pretreatment vs No Treatment | No           | ns      | 0.6335  |
| Pretreatment vs Ab9 Only     | No           | ns      | 0.9835  |
| Pretreatment vs Dox Only     | No           | ns      | 0.6367  |
| Pretreatment vs Dox + Ab9    | No           | ns      | 0.3094  |
| Dox Only vs Dox + Ab9        | No           | ns      | 0.9801  |
| No Treatment vs Ab9 Only     | No           | ns      | 0.9068  |

|                              |              |         |          |
|------------------------------|--------------|---------|----------|
| No Treatment vs Dox Only     | Yes          | *       | 0.0303   |
| No Treatment vs Dox + Ab9    | Yes          | **      | 0.0053   |
| Ab9 Only vs Dox Only         | No           | ns      | 0.2712   |
| Ab9 Only vs Dox + Ab9        | No           | ns      | 0.0845   |
|                              |              |         |          |
| Trial 4 Comparison           | Significant? | Summary | p value  |
| Pretreatment vs No Treatment | No           | ns      | 0.9725   |
| Pretreatment vs Ab9 Only     | No           | ns      | 0.9779   |
| Pretreatment vs Dox Only     | No           | ns      | 0.9507   |
| Pretreatment vs Dox + Ab9    | No           | ns      | 0.1850   |
| Dox Only vs Dox + Ab9        | No           | ns      | 0.5427   |
| No Treatment vs Ab9 Only     | No           | ns      | 0.7232   |
| No Treatment vs Dox Only     | No           | ns      | 0.6238   |
| No Treatment vs Dox + Ab9    | Yes          | *       | 0.0280   |
| Ab9 Only vs Dox Only         | No           | ns      | > 0.9999 |
| Ab9 Only vs Dox + Ab9        | No           | ns      | 0.4603   |
|                              |              |         |          |
| Trial 5 Comparison           | Significant? | Summary | p value  |
| Pretreatment vs No Treatment | No           | ns      | 0.4680   |
| Pretreatment vs Ab9 Only     | No           | ns      | 0.7072   |
| Pretreatment vs Dox Only     | No           | ns      | 0.2638   |
| Pretreatment vs Dox + Ab9    | No           | ns      | 0.2549   |
| Dox Only vs Dox + Ab9        | No           | ns      | > 0.9999 |
| No Treatment vs Ab9 Only     | No           | ns      | 0.9963   |
| No Treatment vs Dox Only     | Yes          | **      | 0.0013   |
| No Treatment vs Dox + Ab9    | Yes          | **      | 0.0013   |
| Ab9 Only vs Dox Only         | Yes          | **      | 0.0063   |
| Ab9 Only vs Dox + Ab9        | Yes          | **      | 0.0062   |
|                              |              |         |          |
| Trial 6 Comparison           | Significant? | Summary | p value  |
| Pretreatment vs No Treatment | No           | ns      | 0.6313   |
| Pretreatment vs Ab9 Only     | No           | ns      | 0.9942   |
| Pretreatment vs Dox Only     | No           | ns      | 0.6855   |
| Pretreatment vs Dox + Ab9    | No           | ns      | 0.1421   |
| Dox Only vs Dox + Ab9        | No           | ns      | 0.8290   |
| No Treatment vs Ab9 Only     | No           | ns      | 0.3343   |
| No Treatment vs Dox Only     | Yes          | *       | 0.0379   |
| No Treatment vs Dox + Ab9    | Yes          | **      | 0.0011   |
| Ab9 Only vs Dox Only         | No           | ns      | 0.8865   |
| Ab9 Only vs Dox + Ab9        | No           | ns      | 0.2844   |
|                              |              |         |          |
| Trial 7 Comparison           | Significant? | Summary | p value  |
| Pretreatment vs No Treatment | No           | ns      | 0.0780   |
| Pretreatment vs Ab9 Only     | No           | ns      | 0.2273   |
| Pretreatment vs Dox Only     | No           | ns      | > 0.9999 |
| Pretreatment vs Dox + Ab9    | No           | ns      | 0.9835   |
| Dox Only vs Dox + Ab9        | No           | ns      | 0.9868   |
| No Treatment vs Ab9 Only     | No           | ns      | 0.9910   |
| No Treatment vs Dox Only     | No           | ns      | 0.0505   |
| No Treatment vs Dox + Ab9    | Yes          | *       | 0.0118   |
| Ab9 Only vs Dox Only         | No           | ns      | 0.1710   |
| Ab9 Only vs Dox + Ab9        | No           | ns      | 0.0537   |
|                              |              |         |          |
| Trial 8 Comparison           | Significant? | Summary | p value  |
| Pretreatment vs No Treatment | No           | ns      | 0.1876   |
| Pretreatment vs Ab9 Only     | No           | ns      | > 0.9999 |
| Pretreatment vs Dox Only     | No           | ns      | 0.3959   |
| Pretreatment vs Dox + Ab9    | No           | ns      | 0.2846   |
| Dox Only vs Dox + Ab9        | No           | ns      | 0.9994   |
| No Treatment vs Ab9 Only     | No           | ns      | 0.2040   |
| No Treatment vs Dox Only     | Yes          | ***     | 0.0004   |
| No Treatment vs Dox + Ab9    | Yes          | ***     | 0.0002   |
| Ab9 Only vs Dox Only         | No           | ns      | 0.3001   |
| Ab9 Only vs Dox + Ab9        | No           | ns      | 0.2045   |

**FC % Freezing (Tukey post hoc)**

| Comparison                   | Significant? | Summary | p value |
|------------------------------|--------------|---------|---------|
| Pretreatment vs No Treatment | No           | ns      | 0.9996  |
| Pretreatment vs Ab9 Only     | No           | ns      | 0.2795  |
| Pretreatment vs Dox Only     | No           | ns      | 0.9876  |
| Pretreatment vs Dox + Ab9    | Yes          | *       | 0.0385  |
| Dox Only vs Dox + Ab9        | No           | ns      | 0.1101  |
| No Treatment vs Ab9 Only     | No           | ns      | 0.3461  |
| No Treatment vs Dox Only     | No           | ns      | 0.9980  |
| No Treatment vs Dox + Ab9    | Yes          | *       | 0.0494  |
| Ab9 Only vs Dox Only         | No           | ns      | 0.5398  |
| Ab9 Only vs Dox + Ab9        | No           | ns      | 0.8968  |

### FC % Freezing by minute (Tukey post hoc)

| Minute 1 Comparison          | Significant? | Summary | p value |
|------------------------------|--------------|---------|---------|
| Pretreatment vs No Treatment | No           | ns      | 0.8403  |
| Pretreatment vs Ab9 Only     | No           | ns      | 0.4717  |
| Pretreatment vs Dox Only     | No           | ns      | 0.9526  |
| Pretreatment vs Dox + Ab9    | No           | ns      | 0.7292  |
| Dox Only vs Dox + Ab9        | No           | ns      | 0.2637  |
| No Treatment vs Ab9 Only     | No           | ns      | 0.9664  |
| No Treatment vs Dox Only     | No           | ns      | 0.3684  |
| No Treatment vs Dox + Ab9    | No           | ns      | 0.9994  |
| Ab9 Only vs Dox Only         | No           | ns      | 0.1106  |
| Ab9 Only vs Dox + Ab9        | No           | ns      | 0.9940  |

| Minute 2 Comparison          | Significant? | Summary | p value  |
|------------------------------|--------------|---------|----------|
| Pretreatment vs No Treatment | No           | ns      | 0.8746   |
| Pretreatment vs Ab9 Only     | No           | ns      | 0.3217   |
| Pretreatment vs Dox Only     | No           | ns      | > 0.9999 |
| Pretreatment vs Dox + Ab9    | No           | ns      | 0.1006   |
| Dox Only vs Dox + Ab9        | No           | ns      | 0.0888   |
| No Treatment vs Ab9 Only     | No           | ns      | 0.8590   |
| No Treatment vs Dox Only     | No           | ns      | 0.8718   |
| No Treatment vs Dox + Ab9    | No           | ns      | 0.5087   |
| Ab9 Only vs Dox Only         | No           | ns      | 0.3035   |
| Ab9 Only vs Dox + Ab9        | No           | ns      | 0.9779   |

| Minute 3 Comparison          | Significant? | Summary | p value |
|------------------------------|--------------|---------|---------|
| Pretreatment vs No Treatment | No           | ns      | 0.9912  |
| Pretreatment vs Ab9 Only     | No           | ns      | 0.5740  |
| Pretreatment vs Dox Only     | No           | ns      | 0.9998  |
| Pretreatment vs Dox + Ab9    | Yes          | *       | 0.0418  |
| Dox Only vs Dox + Ab9        | No           | ns      | 0.0528  |
| No Treatment vs Ab9 Only     | No           | ns      | 0.8186  |
| No Treatment vs Dox Only     | No           | ns      | 0.9983  |
| No Treatment vs Dox + Ab9    | No           | ns      | 0.1046  |
| Ab9 Only vs Dox Only         | No           | ns      | 0.6549  |
| Ab9 Only vs Dox + Ab9        | No           | ns      | 0.6631  |

| Minute 4 Comparison          | Significant? | Summary | p value |
|------------------------------|--------------|---------|---------|
| Pretreatment vs No Treatment | No           | ns      | 0.9896  |
| Pretreatment vs Ab9 Only     | No           | ns      | 0.6424  |
| Pretreatment vs Dox Only     | No           | ns      | 0.9649  |
| Pretreatment vs Dox + Ab9    | No           | ns      | 0.1266  |
| Dox Only vs Dox + Ab9        | No           | ns      | 0.3963  |
| No Treatment vs Ab9 Only     | No           | ns      | 0.3092  |
| No Treatment vs Dox Only     | No           | ns      | 0.7654  |
| No Treatment vs Dox + Ab9    | Yes          | *       | 0.0278  |
| Ab9 Only vs Dox Only         | No           | ns      | 0.9454  |
| Ab9 Only vs Dox + Ab9        | No           | ns      | 0.8521  |

| Minute 5 Comparison          | Significant? | Summary | p value |
|------------------------------|--------------|---------|---------|
| Pretreatment vs No Treatment | No           | ns      | 0.9373  |
| Pretreatment vs Ab9 Only     | No           | ns      | 0.3476  |
| Pretreatment vs Dox Only     | No           | ns      | 0.3203  |
| Pretreatment vs Dox + Ab9    | Yes          | *       | 0.0208  |

|                           |    |    |          |
|---------------------------|----|----|----------|
| Dox Only vs Dox + Ab9     | No | ns | 0.7547   |
| No Treatment vs Ab9 Only  | No | ns | 0.7927   |
| No Treatment vs Dox Only  | No | ns | 0.7678   |
| No Treatment vs Dox + Ab9 | No | ns | 0.1264   |
| Ab9 Only vs Dox Only      | No | ns | > 0.9999 |
| Ab9 Only vs Dox + Ab9     | No | ns | 0.7419   |

### Behavior Continued (Figure S4)

#### Open Field Distance (Tukey post hoc)

| Comparison                   | Significant? | Summary | p value  |
|------------------------------|--------------|---------|----------|
| Pretreatment vs No Treatment | No           | ns      | > 0.9999 |
| Pretreatment vs Ab9 Only     | No           | ns      | 0.9998   |
| Pretreatment vs Dox Only     | No           | ns      | 0.9512   |
| Pretreatment vs Dox + Ab9    | No           | ns      | > 0.9999 |
| Dox Only vs Dox + Ab9        | No           | ns      | 0.9144   |
| No Treatment vs Ab9 Only     | No           | ns      | 0.9985   |
| No Treatment vs Dox Only     | No           | ns      | 0.9073   |
| No Treatment vs Dox + Ab9    | No           | ns      | > 0.9999 |
| Ab9 Only vs Dox Only         | No           | ns      | 0.9792   |
| Ab9 Only vs Dox + Ab9        | No           | ns      | 0.9987   |

#### Open Field % Path in Center (Tukey post hoc)

| Day 1 Comparison             | Significant? | Summary | p value |
|------------------------------|--------------|---------|---------|
| Pretreatment vs No Treatment | No           | ns      | 0.9830  |
| Pretreatment vs Ab9 Only     | No           | ns      | 0.8844  |
| Pretreatment vs Dox Only     | No           | ns      | 0.4098  |
| Pretreatment vs Dox + Ab9    | No           | ns      | 0.8046  |
| Dox Only vs Dox + Ab9        | No           | ns      | 0.9670  |
| No Treatment vs Ab9 Only     | No           | ns      | 0.9937  |
| No Treatment vs Dox Only     | No           | ns      | 0.1296  |
| No Treatment vs Dox + Ab9    | No           | ns      | 0.4389  |
| Ab9 Only vs Dox Only         | No           | ns      | 0.0535  |
| Ab9 Only vs Dox + Ab9        | No           | ns      | 0.2370  |

#### Straight Swim (Tukey post hoc)

| Comparison                   | Significant? | Summary | p value  |
|------------------------------|--------------|---------|----------|
| Pretreatment vs No Treatment | No           | ns      | 0.9983   |
| Pretreatment vs Ab9 Only     | No           | ns      | > 0.9999 |
| Pretreatment vs Dox Only     | No           | ns      | 0.3602   |
| Pretreatment vs Dox + Ab9    | No           | ns      | 0.2128   |
| Dox Only vs Dox + Ab9        | No           | ns      | 0.9975   |
| No Treatment vs Ab9 Only     | No           | ns      | 0.9997   |
| No Treatment vs Dox Only     | No           | ns      | 0.1820   |
| No Treatment vs Dox + Ab9    | No           | ns      | 0.0925   |
| Ab9 Only vs Dox Only         | No           | ns      | 0.2822   |
| Ab9 Only vs Dox + Ab9        | No           | ns      | 0.1566   |

#### Visible Platform (Tukey post hoc)

| Comparison                   | Significant? | Summary | p value  |
|------------------------------|--------------|---------|----------|
| Pretreatment vs No Treatment | No           | ns      | 0.9947   |
| Pretreatment vs Ab9 Only     | No           | ns      | 0.9989   |
| Pretreatment vs Dox Only     | No           | ns      | 0.2205   |
| Pretreatment vs Dox + Ab9    | No           | ns      | 0.1809   |
| Dox Only vs Dox + Ab9        | No           | ns      | > 0.9999 |
| No Treatment vs Ab9 Only     | No           | ns      | > 0.9999 |
| No Treatment vs Dox Only     | No           | ns      | 0.3839   |
| No Treatment vs Dox + Ab9    | No           | ns      | 0.3242   |
| Ab9 Only vs Dox Only         | No           | ns      | 0.3311   |
| Ab9 Only vs Dox + Ab9        | No           | ns      | 0.2773   |

#### Long Term Memory % Path in Target Quadrant (Tukey post hoc)

| Day 1 Comparison             | Significant? | Summary | p value |
|------------------------------|--------------|---------|---------|
| Pretreatment vs No Treatment | No           | ns      | 0.8490  |
| Pretreatment vs Ab9 Only     | No           | ns      | 0.9909  |
| Pretreatment vs Dox Only     | No           | ns      | 0.9964  |

|                           |    |    |        |
|---------------------------|----|----|--------|
| Pretreatment vs Dox + Ab9 | No | ns | 0.9259 |
| Dox Only vs Dox + Ab9     | No | ns | 0.7059 |
| No Treatment vs Ab9 Only  | No | ns | 0.6305 |
| No Treatment vs Dox Only  | No | ns | 0.9444 |
| No Treatment vs Dox + Ab9 | No | ns | 0.3702 |
| Ab9 Only vs Dox Only      | No | ns | 0.9208 |
| Ab9 Only vs Dox + Ab9     | No | ns | 0.9985 |

**Long Term Memory Proximity to Target (Tukey post hoc)**

| Comparison                   | Significant? | Summary | p value  |
|------------------------------|--------------|---------|----------|
| Pretreatment vs No Treatment | No           | ns      | 0.3223   |
| Pretreatment vs Ab9 Only     | No           | ns      | 0.9441   |
| Pretreatment vs Dox Only     | No           | ns      | 0.9357   |
| Pretreatment vs Dox + Ab9    | No           | ns      | > 0.9999 |
| Dox Only vs Dox + Ab9        | No           | ns      | 0.9045   |
| No Treatment vs Ab9 Only     | No           | ns      | 0.7862   |
| No Treatment vs Dox Only     | No           | ns      | 0.6841   |
| No Treatment vs Dox + Ab9    | No           | ns      | 0.2521   |
| Ab9 Only vs Dox Only         | No           | ns      | > 0.9999 |
| Ab9 Only vs Dox + Ab9        | No           | ns      | 0.9223   |
